# Supplementary material
Source: publisher site journal article supplement (https://www.dovepress.com/article/605453)
Supplement: Supplementary file 1 [file 605453%20Supplementary%20Document%201-3_1.pdf]

## Supplementary Document 1

### Patient Restraint Management Quality Checklist

Department to be Checked: \_\_\_\_\_ Check Date: \_\_\_\_\_ Checker: \_\_\_\_\_

| Check Content                                                       | Value | Score | Inspection Method                                                                   | Note                                                                                    |
|---------------------------------------------------------------------|-------|-------|-------------------------------------------------------------------------------------|-----------------------------------------------------------------------------------------|
| <b>1. Assessment and Documentation</b>                              |       |       |                                                                                     |                                                                                         |
| Verify validity of the restraint medical order                      | 5     |       | Review medical orders; deduct 1 point per discrepancy                               | Restraint orders are valid for 24 hours and specify the restrained body part & duration |
| Verify existence of a restraint informed consent form               | 5     |       | Review medical records; deduct 1 point per discrepancy; 0 points if no consent form |                                                                                         |
| Document initiation of restraint                                    | 5     |       | Review nursing records; deduct 1 point per discrepancy                              | Use restraints per orders; document reason, device type, restrained part & start time   |
| Conduct and document assessment every 2 hours                       | 5     |       | Review nursing records; deduct 1 point per discrepancy                              | Document skin condition, blood circulation at the restrained site & relaxation time     |
| Provide 3–5 minutes of restraint release every 2 hours and document | 5     |       | Review nursing records; deduct 1 point per discrepancy                              |                                                                                         |
| Document termination of restraint                                   | 5     |       | Review nursing records; deduct 1 point per discrepancy                              | Document restraint stop time, skin/circulation status & reason for release              |
| Document restraint assessment before off-unit examinations          | 5     |       | Review nursing records; deduct 1 point per discrepancy                              |                                                                                         |
| Document PR education provided to patient/family                    | 5     |       | Review nursing records; deduct 1 point per discrepancy                              |                                                                                         |
| Develop and document an individualized                              | 5     |       | Review nursing records; deduct 1 point per                                          | Care plan includes “Risk for Impaired Skin Integrity”                                   |

| Check Content                                                           | Value | Score | Inspection Method                                                             | Note                                                                                           |
|-------------------------------------------------------------------------|-------|-------|-------------------------------------------------------------------------------|------------------------------------------------------------------------------------------------|
| restraint care plan                                                     |       |       | discrepancy                                                                   |                                                                                                |
| <b>2. Ensuring Effective Restraint</b>                                  |       |       |                                                                               |                                                                                                |
| Select appropriate restraint devices                                    | 5     |       | Review nursing records; deduct 1 point per discrepancy                        | Use appropriate restraints (e.g., limb restraints, wrist restraints)                           |
| Maintain proper restraint tightness                                     | 5     |       | Review nursing records; deduct 1 point per discrepancy                        | Allow 1–2 finger widths of space for safe tightness                                            |
| Secure restraints to correct anchor points                              | 5     |       | Review nursing records; deduct 1 point per discrepancy                        | Attach straps to the bed frame, not bed rails                                                  |
| Maintain restrained limbs in functional position with adequate mobility | 5     |       | Review nursing records; deduct 1 point per discrepancy                        | Ensure limbs cannot reach tubes; keep in functional position                                   |
| Keep skin at restrained sites clean and intact                          | 5     |       | Review nursing records; deduct 1 point per discrepancy                        | Skin should be dry, odorless, free of bruising or injury                                       |
| Ensure normal distal limb blood circulation                             | 5     |       | Review nursing records; deduct 1 point per discrepancy                        | Prevent pallor, cyanosis, coldness, numbness or paresthesia                                    |
| Perform effective hourly safety rounds                                  | 5     |       | Direct patient observation & staff interviews; deduct 1 point per discrepancy | Eliminate risks: circulatory issues, agitation, falls, tube dislodgement, self-harm            |
| Implement bedside handover; provide PR leaflets and reminder signs      | 5     |       | Interview nurses/families; deduct 1 point per discrepancy                     |                                                                                                |
| Ensure safe patient environment                                         | 5     |       | On-site inspection; deduct 1 point per non-compliance                         | Quiet, well-lit, appropriate temperature/humidity; remove hazards (belts, lighters, glassware) |
| Meet physiological & psychological needs;                               | 5     |       | Direct observation & interviews; deduct 1                                     | Support hydration, nutrition, toileting, positioning;                                          |

| Check Content                                                             | Value | Score | Inspection Method                                                          | Note                                             |
|---------------------------------------------------------------------------|-------|-------|----------------------------------------------------------------------------|--------------------------------------------------|
| practice humanistic restraint                                             |       |       | point per discrepancy                                                      | provide comfort, distraction & therapeutic touch |
| <b>3. Evaluation</b>                                                      |       |       |                                                                            |                                                  |
| Complete PR-related management training                                   | 5     |       | Review training records & interview nurses; deduct 1 point per discrepancy |                                                  |
| Analyze departmental PR rates and implement improvements                  | 5     |       | Review records & interview nurses; deduct 1 point per discrepancy          |                                                  |
| Conduct restraint quality audits with analysis & improvement              | 5     |       | Review documents & interview nurses; deduct 1 point per discrepancy        |                                                  |
| Nurses demonstrate knowledge of PR management protocols                   | 5     |       | Interview nurses; deduct 1 point per discrepancy                           |                                                  |
| Primary nurses explain restraint purpose and humanistic restraint methods | 5     |       | Interview nurses; deduct 1 point per discrepancy                           |                                                  |
| Family/caregivers understand restraint precautions                        | 5     |       | Interview family/caregivers; deduct 1 point per discrepancy                | Nurses provide restraint education materials     |
| No adverse events related to improper restraint                           | 5     |       | Review records & interview nurses; deduct 1 point per discrepancy          |                                                  |

Note: Supplementary Document 1: Protective Restraint Nursing Quality Evaluation Index System

It includes 3 dimensions: Assessment and Documentation, Ensuring Effective Restraint, Evaluation; total 26 indicators

## Supplementary Document 2

### Physical Restraint Guidance

#### Dear Family members:

During hospitalization, your family member may suffer from cognitive or consciousness disorders, or other conditions that pose safety risks (e.g., falling out of bed) or interfere with necessary treatment (e.g., pulling out medical tubes). After professional assessment by medical staff, appropriate physical restraints will be applied if necessary to safeguard the patient.

#### 1. Common Restraint Devices and Application Methods

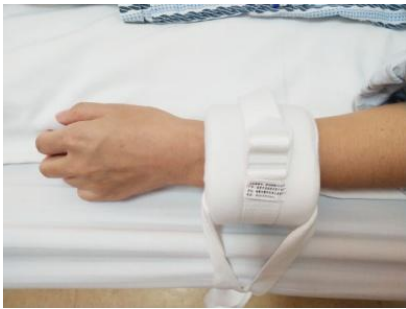

Restraint Strap

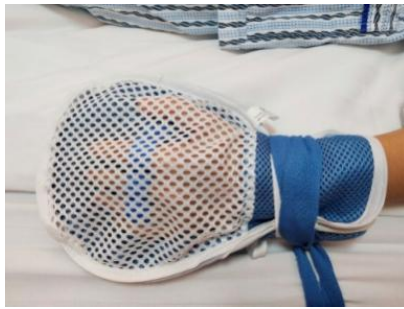

Restraint Gloves

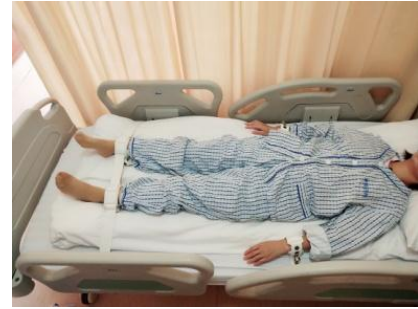

Magnetic Buckle Restraint Belt

#### 2. Key Precautions for Restraint Use

- Restraint devices may trigger anxiety or resistance in patients; our nurses will provide emotional comfort and reassurance.
- Restraints must be fastened with proper tightness (1–2 fingers can be inserted underneath) to avoid impairing blood circulation. Only nurses are authorized to apply restraints; please do not adjust them without permission.
- During restraint, ensure the restrained limbs cannot reach medical tubes to prevent accidental extubation.
- Cotton padding will be placed on bony prominences (wrists, ankles) before restraint to avoid skin abrasions.
- Restraint belts must be fixed vertically to the bed frame (not side rails) and secured firmly. Sufficient limb movement space shall be reserved, and the restraint must be easily releasable in emergencies.

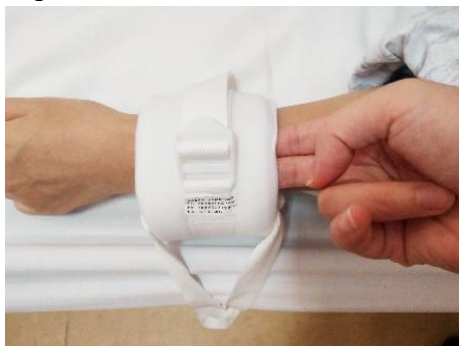

Proper tightness: 1–2 fingers can be inserted underneath

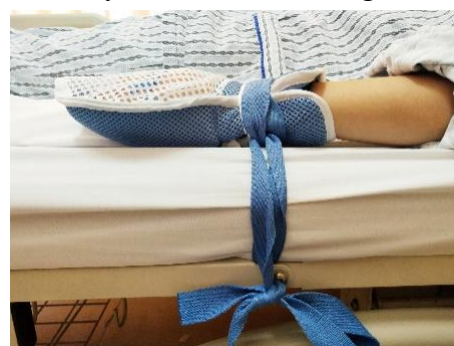

Fixation: vertically fixed to the bed frame

- Nurses will routinely check the skin condition, blood circulation and effectiveness of restraints, and release the restraints periodically. Please assist with cleaning the skin at the restrained area.

## Important Additional Reminders

1. If you (the caregiver) need to temporarily release restraints (e.g., for patient bathing, bed sheet changing), please notify medical staff first and wait for their assessment and approval.
2. If you (the caregiver) need to leave temporarily, please inform the nurses in advance to avoid any safety risks to the patient.

Data source: Zhuang Xiaoyan, Xu Qin, Zhu Shuqin, et al. Risk assessment and management of Physical restraint failure [J], Chinese Journal of Nursing, 2014, 49 (7) :816-820.

Version number: H-014703-1909-V1.0

Note: Illustrated and Text-Based Health Education Leaflet on Physical Restraints, covering the purpose of restraints, operational methods, and relevant precautions.

## Hello, caregiver

Should temporary removal of the patient's restraints be required—for instance, to perform body cleansing, change bed linens, or assist with physical activity—please notify the nurse immediately and obtain confirmation before proceeding.

If you need to leave temporarily, inform the nurse to prevent danger and ensure patient safety.

Thank you for your cooperation. The medical staff will inform you when to release the restraint as the patient's condition improves.

**For the patient's early recovery, the nurse will wear restraint tools for the patient; please do not adjust yourself!**

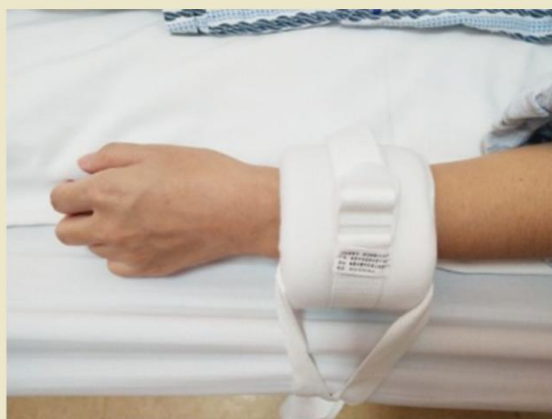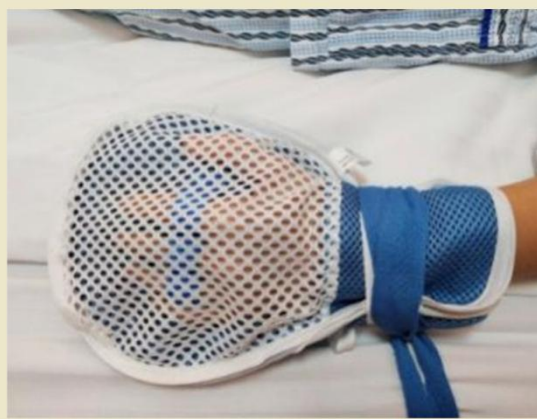

If the carer is kind enough to relax the restraint for the patient without permission, it will lead to unplanned extubation, falling out of bed, self-harm, and other serious consequences, which will prolong the hospitalization time, increase the patient's pain, and increase the medical cost.

Note: Bedside Physical Restraint (PR) Reminder Sign

This is a simplified version of the physical restraint health education leaflet, intended to be hung on the patient's intravenous (IV) stand.
